# Supplementary material
Source: PubMed Central journal article supplement (PMC6648376)
Supplement: ao9b00983_si_001.pdf [file ao9b00983_si_001.pdf]

1 **Supporting information**

2  
3 **Highly regioselective and stereoselective hydroxylation of free amino acids by a 2-**  
4 **oxoglutarate-dependent dioxygenase from *Kutzneria albida***

5 Xiaoran Jing<sup>†</sup>, Xinye Wang<sup>†</sup>, Wenli Zhang<sup>†</sup>, Jianhong An<sup>†</sup>, Pengjie Luo<sup>l\*</sup>, Yao Nie<sup>†\*</sup>, Yan  
6 Xu<sup>†,‡</sup>

7  
8 <sup>†</sup>Key Laboratory of Industrial Biotechnology of Ministry of Education and School of  
9 Biotechnology, Jiangnan University, 1800 Lihu Road, Wuxi 214122, China

10 <sup>‡</sup>State Key Laboratory of Food Science and Technology, Jiangnan University, 1800 Lihu  
11 Road, Wuxi 214122, China

12 <sup>l</sup>China National Center for Food Safety Risk Assessment, NHC Key Laboratory  
13 of Food Safety Risk Assessment, 37 Guangqu Road, Beijing 100022, China

14  
15 \*Correspondence and requests for materials should be addressed to P.L. (E-mail:  
16 pengjieluo@cfsa.net.cn) and Y.N. (E-mail: ynie@jiangnan.edu.cn).

17 Address:

18 China National Center for Food Safety Risk Assessment, NHC Key Laboratory  
19 of Food Safety Risk Assessment, 37 Guangqu Road, Beijing 100022, China

20 School of Biotechnology and Key Laboratory of Industrial Biotechnology, Ministry of  
21 Education, Jiangnan University, 1800 Lihu Road, Wuxi 214122, China

22  
23  
24

25 **NMR analysis**

26  $^1\text{H}$ ,  $^{13}\text{C}$  NMR were recorded on Avance 400 (Bruker, Billerica, MA, USA) at 400 MHz ( $^1\text{H}$   
27 NMR), 100 MHz ( $^{13}\text{C}$  NMR). Chemical shifts were reported in ppm down field from internal  
28 Me<sub>4</sub>Si. Multiplicity was indicated as follows: s (singlet), d (doublet), t (triplet), q (quartet), m  
29 (multiplet), dd (doublet of doublet), br (broad). Coupling constants were reported in Hertz  
30 (Hz).

31

32

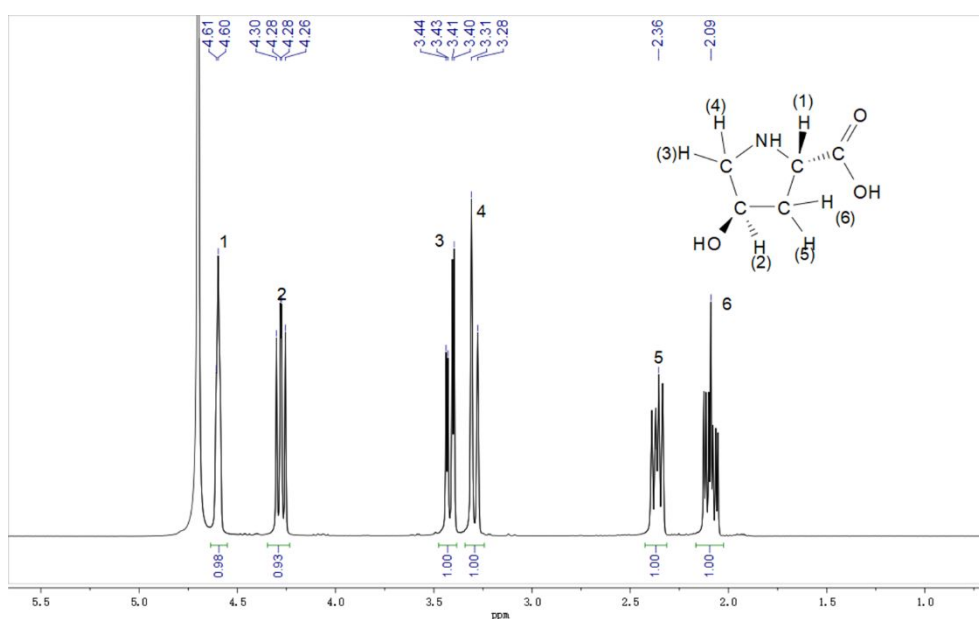

33

34

35

36

37

38

39

40

$^1\text{H}$  NMR (400 MHz, D<sub>2</sub>O),  $\delta$ 4.60 (s, 1H), 4.28 (d, J = 2.0 Hz, 1H), 3.40 (d, J = 3.7 Hz, 1H),  
3.34 – 3.21 (m, 1H), 2.35 (d, J = 8.0 Hz, 1H), 2.09 (s, 1H)

Figure S1 Analysis of product generated from L-proline hydroxylation by  $^1\text{H}$ -NMR spectrum

41

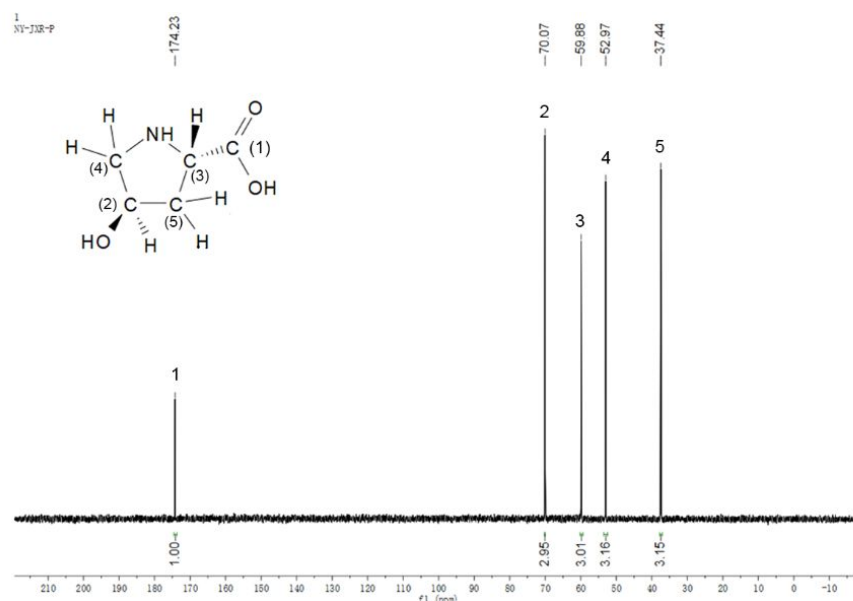

<sup>13</sup>C NMR (101 MHz, D<sub>2</sub>O) δ 174.23 (s), 70.07 (s), 59.88 (s), 52.97 (s), 37.44 (s).

Figure S2 Analysis of product generated from L-proline hydroxylation by <sup>13</sup>C-NMR spectrum

42  
43  
44  
45  
46  
47  
48  
49

50

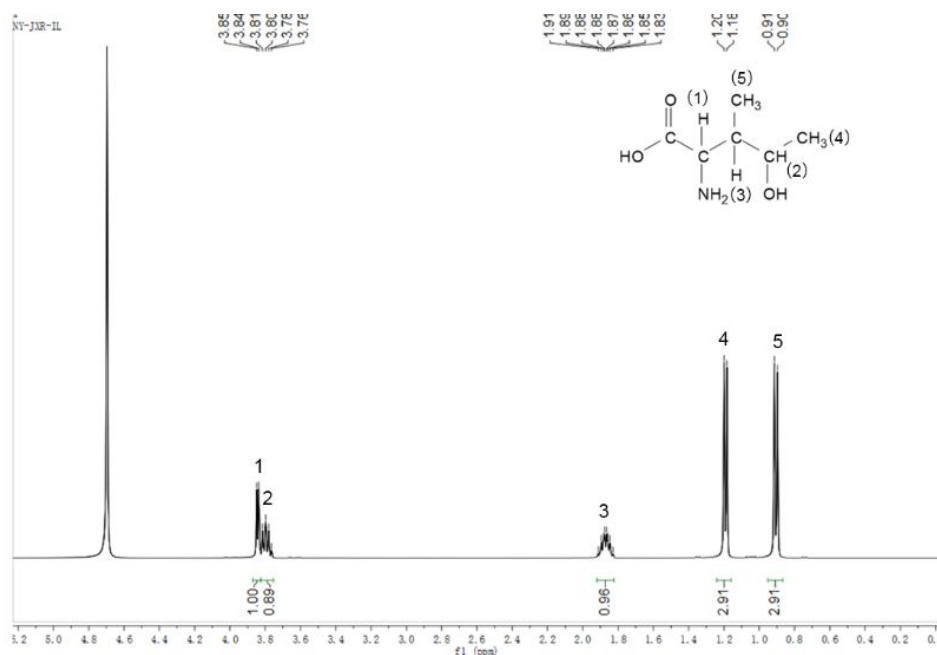

51  
52  
53  
54  
55  
56  
57  
58  
59

$^1\text{H}$  NMR (400 MHz, D<sub>2</sub>O)  $\delta$  3.84 (d, J = 4.4 Hz, 1H), 3.79 (dd, J = 13.6, 6.8 Hz, 1H), 1.92 – 1.82 (m, 1H), 1.19 (d, J = 6.3 Hz, 3H), 0.91 (d, J = 7.1 Hz, 3H).

Figure S3 Analysis of product generated from L-isoleucine hydroxylation by  $^1\text{H}$ -NMR spectrum

60  
61  
62  
63  
64

## LC-MS analysis

LC-MS analysis of three products were recorded on the ACQUITY UPLC-MS/MS SYSTEM-WATERS instrument.

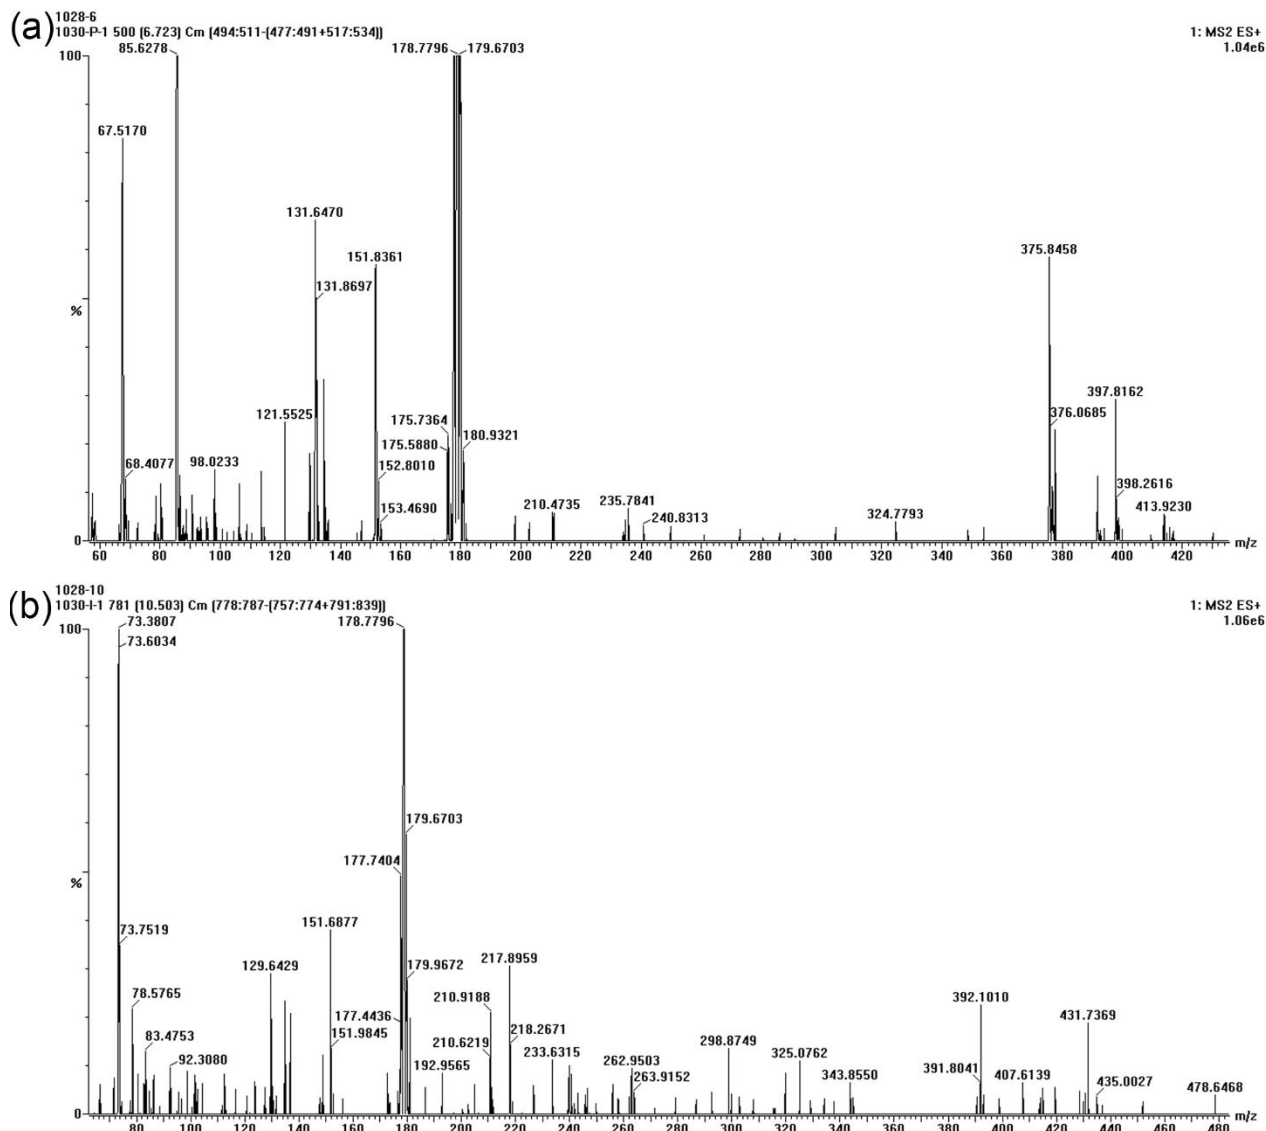

65  
66  
67  
68  
69

Figure S4 LC-MS analysis of products after the incubation of *KaPH1* with different amino acids as substrate. (a) Fmoc-4-Hyp detected in the reaction mixture was analyzed by MS; (b) Fmoc-4-HIL detected in the reaction mixture was analyzed by MS.
